# Supplementary material for: Herausforderungen bei der Schätzung von Trends in Schulleistungsstudien
Source: Atypon-hosted journal article supplement (doi:10.1026/0012-1924/a000177), 2016-12-06
Supplement: 0012-1924_a000177_esm1.pdf [file 0012-1924_a000177_esm1.pdf]

## *Supplement*

# Herausforderungen bei der Schätzung von Trends in Schulleistungstudien: Eine Skalierung der deutschen PISA-Daten

A. Robitzsch, O. Lüdtke, O. Köller, U. Kröhne, F. Goldhammer & J.-H. Heine

Dezember 2016

### **Inhaltsverzeichnis**

|   |                                                                                                                                     |    |
|---|-------------------------------------------------------------------------------------------------------------------------------------|----|
| A | Übersicht über verwendete Linkitems                                                                                                 | 1  |
| B | Tabellarische Übersicht der verwendeten Skalierungsmethoden                                                                         | 17 |
| C | Zusatzanalyse: Trendschätzung in Naturwissenschaften unter ausschließlicher Berücksichtigung der Items aus früheren PISA-Erhebungen | 18 |

## A. Übersicht über verwendete Linkitems

In den Tabellen A1 bis A6 sind für die drei Kompetenzdomänen Naturwissenschaften, Mathematik und Lesen für die verwendeten Linkitems die Itemnamen in den jeweiligen Erhebungen für das Programme for International Student Assessment (PISA) bzw. die aus dem 1PL-Modell für die deutschen Stichproben erhaltenen Itemparameter aufgeführt. Zusätzlich wird angegeben, welche der Items als invariant laut Organisation for Economic Co-operation and Development (OECD) für papierbasierten und computerbasierten Testmodus angenommen wurden.

*Tabelle A1.* Linkitems für Naturwissenschaften mit in den verschiedenen PISA-Erhebungen verwendeten Itembezeichnungen

| Index | Item     | 2006     | 2009     | 2012      | 2015      | 2014      |
|-------|----------|----------|----------|-----------|-----------|-----------|
| 1     | S131Q02T | S131Q02T | S131Q02D | PS131Q02D | DS131Q02C | DS131Q02C |
| 2     | S131Q04T | S131Q04T | S131Q04D | PS131Q04D | DS131Q04C | DS131Q04C |
| 3     | S256Q01  | S256Q01  | S256Q01  | PS256Q01  | CS256Q01S | DS256Q01C |
| 4     | S268Q01  | S268Q01  |          |           | CS268Q01S | DS268Q01C |
| 5     | S268Q02T | S268Q02T |          |           | DS268Q02C | DS268Q02C |
| 6     | S268Q06  | S268Q06  |          |           | CS268Q06S | DS268Q06C |
| 7     | S269Q01  | S269Q01  | S269Q01  | PS269Q01  | DS269Q01C | DS269Q01C |
| 8     | S269Q03T | S269Q03T | S269Q03D | PS269Q03D | DS269Q03C | DS269Q03C |
| 9     | S269Q04T | S269Q04T | S269Q04T | PS269Q04T | CS269Q04S | DS269Q04C |
| 10    | S304Q01  | S304Q01  |          |           | DS304Q01C | DS304Q01C |
| 11    | S304Q02  | S304Q02  |          |           | CS304Q02S | DS304Q02C |
| 12    | S326Q01  | S326Q01  | S326Q01  | PS326Q01  | DS326Q01C | DS326Q01C |
| 13    | S326Q02  | S326Q02  | S326Q02  | PS326Q02  | DS326Q02C | DS326Q02C |
| 14    | S326Q03  | S326Q03  | S326Q03  | PS326Q03  | CS326Q03S | DS326Q03C |
| 15    | S326Q04T | S326Q04T | S326Q04T | PS326Q04T | CS326Q04S | DS326Q04C |
| 16    | S408Q01  | S408Q01  | S408Q01  | PS408Q01  | CS408Q01S | DS408Q01C |
| 17    | S408Q03  | S408Q03  | S408Q03  | PS408Q03  | DS408Q03C | DS408Q03C |
| 18    | S408Q04T | S408Q04T | S408Q04T | PS408Q04T | CS408Q04S | DS408Q04C |
| 19    | S408Q05  | S408Q05  | S408Q05  | PS408Q05  | CS408Q05S | DS408Q05C |
| 20    | S413Q04T | S413Q04T | S413Q04T | PS413Q04T | CS413Q04S | DS413Q04C |
| 21    | S413Q05  | S413Q05  | S413Q05  | PS413Q05  | CS413Q05S | DS413Q05C |
| 22    | S413Q06  | S413Q06  | S413Q06  | PS413Q06  | CS413Q06S | DS413Q06C |
| 23    | S415Q02  | S415Q02  | S415Q02  | PS415Q02  | CS415Q02S | DS415Q02C |
| 24    | S415Q07T | S415Q07T | S415Q07T | PS415Q07T | CS415Q07S | DS415Q07C |
| 25    | S416Q01  | S416Q01  |          |           | DS416Q01C | DS416Q01C |
| 26    | S421Q01  | S421Q01  |          |           | CS421Q01S | DS421Q01C |
| 27    | S421Q03  | S421Q03  |          |           | CS421Q03S | DS421Q03C |
| 28    | S425Q02  | S425Q02  | S425Q02  | PS425Q02  | CS425Q02S | DS425Q02C |
| 29    | S425Q03  | S425Q03  | S425Q03  | PS425Q03  | DS425Q03C | DS425Q03C |
| 30    | S425Q04  | S425Q04  | S425Q04  | PS425Q04  | DS425Q04C | DS425Q04C |

*Anmerkungen.* Index = laufende Nummer.

*Fortsetzung Tabelle A1.* Linkitems für Naturwissenschaften mit in den verschiedenen PISA-Erhebungen verwendeten Itembezeichnungen

| Index | Item     | 2006     | 2009     | 2012      | 2015      | 2014      |
|-------|----------|----------|----------|-----------|-----------|-----------|
| 31    | S425Q05  | S425Q05  | S425Q05  | PS425Q05  | CS425Q05S | DS425Q05C |
| 32    | S428Q01  | S428Q01  | S428Q01  | PS428Q01  | CS428Q01S | DS428Q01C |
| 33    | S428Q03  | S428Q03  | S428Q03  | PS428Q03  | CS428Q03S | DS428Q03C |
| 34    | S428Q05  | S428Q05  | S428Q05  | PS428Q05  | DS428Q05C | DS428Q05C |
| 35    | S437Q01  | S437Q01  |          |           | CS437Q01S | DS437Q01C |
| 36    | S437Q03  | S437Q03  |          |           | CS437Q03S | DS437Q03C |
| 37    | S437Q04  | S437Q04  |          |           | CS437Q04S | DS437Q04C |
| 38    | S437Q06  | S437Q06  |          |           | DS437Q06C | DS437Q06C |
| 39    | S438Q01T | S438Q01T | S438Q01T | PS438Q01T | CS438Q01S | DS438Q01C |
| 40    | S438Q02  | S438Q02  | S438Q02  | PS438Q02  | CS438Q02S | DS438Q02C |
| 41    | S438Q03T | S438Q03T | S438Q03D | PS438Q03D | DS438Q03C | DS438Q03C |
| 42    | S458Q01  | S458Q01  |          |           | DS458Q01C | DS458Q01C |
| 43    | S458Q02T | S458Q02T |          |           | CS458Q02S | DS458Q02C |
| 44    | S465Q01  | S465Q01  | S465Q01  | PS465Q01  | DS465Q01C | DS465Q01C |
| 45    | S465Q02  | S465Q02  | S465Q02  | PS465Q02  | CS465Q02S | DS465Q02C |
| 46    | S465Q04  | S465Q04  | S465Q04  | PS465Q04  | CS465Q04S | DS465Q04C |
| 47    | S466Q01T | S466Q01T | S466Q01T | PS466Q01T | CS466Q01S | DS466Q01C |
| 48    | S466Q05  | S466Q05  | S466Q05  | PS466Q05  | CS466Q05S | DS466Q05C |
| 49    | S466Q07T | S466Q07T | S466Q07T | PS466Q07T | CS466Q07S | DS466Q07C |
| 50    | S476Q01  | S476Q01  |          |           | CS476Q01S | DS476Q01C |
| 51    | S476Q02  | S476Q02  |          |           | CS476Q02S | DS476Q02C |
| 52    | S476Q03  | S476Q03  |          |           | CS476Q03S | DS476Q03C |
| 53    | S478Q01  | S478Q01  | S478Q01  | PS478Q01  | CS478Q01S | DS478Q01C |
| 54    | S478Q02T | S478Q02T | S478Q02T | PS478Q02T | CS478Q02S | DS478Q02C |
| 55    | S478Q03T | S478Q03T | S478Q03T | PS478Q03T | CS478Q03S | DS478Q03C |
| 56    | S495Q01T | S495Q01T |          |           | CS495Q01S | DS495Q01C |
| 57    | S495Q02T | S495Q02T |          |           | CS495Q02S | DS495Q02C |
| 58    | S495Q03  | S495Q03  |          |           | DS495Q03C | DS495Q03C |
| 59    | S495Q04T | S495Q04T |          |           | CS495Q04S | DS495Q04C |
| 60    | S498Q02T | S498Q02T | S498Q02T | PS498Q02T | CS498Q02S | DS498Q02C |

*Anmerkungen.* Index = laufende Nummer.

*Fortsetzung Tabelle A1.* Linkitems für Naturwissenschaften mit in den verschiedenen PISA-Erhebungen verwendeten Itembezeichnungen

| Index | Item     | 2006     | 2009     | 2012      | 2015      | 2014      |
|-------|----------|----------|----------|-----------|-----------|-----------|
| 61    | S498Q03  | S498Q03  | S498Q03  | PS498Q03  | CS498Q03S | DS498Q03C |
| 62    | S498Q04  | S498Q04  | S498Q04  | PS498Q04  | DS498Q04C | DS498Q04C |
| 63    | S510Q01T | S510Q01T |          |           | CS510Q01S | DS510Q01C |
| 64    | S510Q04T | S510Q04T |          |           | DS510Q04C | DS510Q04C |
| 65    | S514Q02  | S514Q02  | S514Q02  | PS514Q02  | DS514Q02C | DS514Q02C |
| 66    | S514Q03  | S514Q03  | S514Q03  | PS514Q03  | DS514Q03C | DS514Q03C |
| 67    | S514Q04  | S514Q04  | S514Q04  | PS514Q04  | DS514Q04C | DS514Q04C |
| 68    | S519Q01  | S519Q01  | S519Q01  | PS519Q01  | DS519Q01C | DS519Q01C |
| 69    | S519Q02T | S519Q02T | S519Q02T | PS519Q02T | CS519Q02S | DS519Q02C |
| 70    | S519Q03  | S519Q03  | S519Q03  | PS519Q03  | DS519Q03C | DS519Q03C |
| 71    | S521Q02  | S521Q02  | S521Q02  | PS521Q02  | CS521Q02S | DS521Q02C |
| 72    | S521Q06  | S521Q06  | S521Q06  | PS521Q06  | CS521Q06S | DS521Q06C |
| 73    | S524Q06T | S524Q06T |          |           | CS524Q06S | DS524Q06C |
| 74    | S524Q07  | S524Q07  |          |           | DS524Q07C | DS524Q07C |
| 75    | S527Q01T | S527Q01T | S527Q01T | PS527Q01T | CS527Q01S | DS527Q01C |
| 76    | S527Q03T | S527Q03T | S527Q03T | PS527Q03T | CS527Q03S | DS527Q03C |
| 77    | S527Q04T | S527Q04T | S527Q04T | PS527Q04T | CS527Q04S | DS527Q04C |

*Anmerkungen.* Index = laufende Nummer.

*Tabelle A2.* Mittlere Itemschwierigkeiten aus dem 1PL-Modell für die Linkitems in der Kompetenzdomäne Naturwissenschaften

| Index | Item     | Item-<br>gruppe | inv. | 2006<br>PBA | 2009<br>PBA | 2012<br>PBA | 2015<br>CBA | 2014<br>PBA vs.<br>CBA |
|-------|----------|-----------------|------|-------------|-------------|-------------|-------------|------------------------|
| 1     | S131Q02T | S2A             | X    | -0.20       | -0.17       | -0.27       | -0.85       | -0.27                  |
| 2     | S131Q04T | S2A             | X    | 0.73        | 0.88        | 0.91        | 0.18        | -0.31                  |
| 3     | S256Q01  | S2A             | X    | -2.77       | -2.60       | -2.89       | -2.81       | -1.10                  |
| 4     | S268Q01  | S2B             | X    | -1.50       |             |             | -1.26       | -0.07                  |
| 5     | S268Q02T | S2B             | X    | 1.12        |             |             | 1.51        | 0.30                   |
| 6     | S268Q06  | S2B             |      | -0.73       |             |             | -0.08       | -0.38                  |
| 7     | S269Q01  | S2A             |      | -1.05       | -1.04       | -1.10       | -0.59       | -0.74                  |
| 8     | S269Q03T | S2A             | X    | 0.30        | 0.18        | 0.06        | -0.31       | -0.19                  |
| 9     | S269Q04T | S2A             | X    | 0.56        | 0.88        | 0.56        | 1.04        | -0.54                  |
| 10    | S304Q01  | S2B             |      | 0.04        |             |             | 0.69        | -0.46                  |
| 11    | S304Q02  | S2B             | X    | -0.71       |             |             | -0.53       | -0.01                  |
| 12    | S326Q01  | S2A             | X    | -0.38       | -0.37       | -0.31       | 0.49        | -0.11                  |
| 13    | S326Q02  | S2A             | X    | -1.06       | -1.04       | -0.94       | -0.57       | 0.24                   |
| 14    | S326Q03  | S2A             | X    | -0.87       | -1.03       | -1.29       | -0.78       | -0.39                  |
| 15    | S326Q04T | S2A             | X    | 1.55        | 1.20        | 1.05        | 1.13        | -0.15                  |
| 16    | S408Q01  | S2A             | X    | -0.72       | -0.71       | -0.92       | -0.87       | -0.20                  |
| 17    | S408Q03  | S2A             | X    | 1.17        | 1.81        | 0.07        | 1.78        | 0.17                   |
| 18    | S408Q04T | S2A             | X    | -0.26       | -0.44       | -0.44       | -0.30       | -0.09                  |
| 19    | S408Q05  | S2A             | X    | 0.16        | 0.21        | 0.13        | 0.11        | 0.11                   |
| 20    | S413Q04T | S2A             | X    | -0.17       | -0.25       | -0.42       | -0.06       | -0.38                  |
| 21    | S413Q05  | S2A             | X    | -1.23       | -1.34       | -1.35       | -1.07       | -0.14                  |
| 22    | S413Q06  | S2A             | X    | 0.35        | 0.43        | 0.32        | 0.64        | -0.61                  |
| 23    | S415Q02  | S2A             | X    | -2.28       | -2.19       | -1.98       | -2.06       | 0.18                   |
| 24    | S415Q07T | S2A             | X    | -1.51       | -1.62       | -1.84       | -1.81       | -0.25                  |
| 25    | S416Q01  | S2B             | X    | 0.13        |             |             | 0.14        | -0.76                  |
| 26    | S421Q01  | S2B             |      | 0.84        |             |             | 0.66        | -0.61                  |
| 27    | S421Q03  | S2B             | X    | -0.52       |             |             | -0.49       | -0.38                  |
| 28    | S425Q02  | S2A             | X    | 0.30        | 0.10        | -0.10       | -0.19       | -0.43                  |
| 29    | S425Q03  | S2A             | X    | 0.36        | 0.36        | 0.27        | 0.41        | -0.14                  |
| 30    | S425Q04  | S2A             | X    | 0.48        | 0.31        | 0.23        | 0.68        | -0.44                  |

*Anmerkungen.* Index = laufende Nummer, inv. = invariantes Item (laut OECD), PBA = papierbasierte Administration, CBA = computerbasierte Administration.

Fortsetzung Tabelle A2. Mittlere Itemschwierigkeiten aus dem 1PL-Modell für die Linkitems in der Kompetenzdomäne Naturwissenschaften

| Index | Item     | Item-<br>gruppe | inv. | 2006<br>PBA | 2009<br>PBA | 2012<br>PBA | 2015<br>CBA | 2014<br>PBA vs.<br>CBA |
|-------|----------|-----------------|------|-------------|-------------|-------------|-------------|------------------------|
| 31    | S425Q05  | S2A             | X    | -0.97       | -1.01       | -1.09       | -0.91       | -0.09                  |
| 32    | S428Q01  | S2A             |      | -0.66       | -0.58       | -0.69       | -0.39       | -0.40                  |
| 33    | S428Q03  | S2A             | X    | -1.40       | -1.34       | -1.54       | -1.31       | -0.19                  |
| 34    | S428Q05  | S2A             | X    | -0.05       | 0.00        | -0.31       | -0.09       | -0.34                  |
| 35    | S437Q01  | S2B             | X    | -1.25       |             |             | -1.02       | -0.22                  |
| 36    | S437Q03  | S2B             | X    | 0.23        |             |             | 0.19        | 0.42                   |
| 37    | S437Q04  | S2B             |      | -0.41       |             |             | -0.61       | -0.05                  |
| 38    | S437Q06  | S2B             | X    | -1.89       |             |             | -1.71       | -0.28                  |
| 39    | S438Q01T | S2A             |      | -2.39       | -2.46       | -2.28       | -1.93       | -0.82                  |
| 40    | S438Q02  | S2A             |      | -0.30       | -0.53       | -0.44       | -0.23       | -0.72                  |
| 41    | S438Q03T | S2A             | X    | 0.44        | 0.54        | 0.72        | 0.15        | -0.81                  |
| 42    | S458Q01  | S2B             |      | 2.09        |             |             | 2.57        | 0.61                   |
| 43    | S458Q02T | S2B             |      | -0.39       |             |             | 0.07        | -0.66                  |
| 44    | S465Q01  | S2A             |      | 0.20        | 0.23        | 0.07        | 0.26        | 0.22                   |
| 45    | S465Q02  | S2A             | X    | -0.31       | -0.25       | -0.16       | -0.51       | 0.12                   |
| 46    | S465Q04  | S2A             | X    | 0.52        | 0.63        | 0.66        | 0.70        | -0.02                  |
| 47    | S466Q01T | S2A             |      | -1.28       | -1.31       | -1.20       | -1.12       | -0.62                  |
| 48    | S466Q05  | S2A             |      | -0.95       | -0.70       | -0.79       | -0.96       | -0.01                  |
| 49    | S466Q07T | S2A             | X    | -2.14       | -1.48       | -1.63       | -1.64       | 0.22                   |
| 50    | S476Q01  | S2B             | X    | -1.30       |             |             | -1.17       | 0.10                   |
| 51    | S476Q02  | S2B             | X    | -1.68       |             |             | -1.61       | 0.33                   |
| 52    | S476Q03  | S2B             | X    | -1.14       |             |             | -1.02       | -0.78                  |
| 53    | S478Q01  | S2A             | X    | 0.53        | 0.56        | 0.22        | 0.40        | 0.02                   |
| 54    | S478Q02T | S2A             | X    | -0.30       | -0.36       | -0.55       | -0.20       | -0.31                  |
| 55    | S478Q03T | S2A             |      | -1.43       | -1.49       | -1.74       | -1.31       | -0.48                  |
| 56    | S495Q01T | S2B             | X    | 0.68        |             |             | 0.48        | -0.33                  |
| 57    | S495Q02T | S2B             | X    | -0.44       |             |             | -0.35       | -0.24                  |
| 58    | S495Q03  | S2B             | X    | 0.26        |             |             | 0.47        | -0.17                  |
| 59    | S495Q04T | S2B             |      | -0.40       |             |             | 0.67        | -0.35                  |
| 60    | S498Q02T | S2A             | X    | 0.13        | 0.19        | 0.19        | 0.33        | -0.08                  |

Anmerkungen. Index = laufende Nummer, inv. = invariantes Item (laut OECD), PBA = papierbasierte Administration, CBA = computerbasierte Administration.

Fortsetzung Tabelle A2. Mittlere Itemschwierigkeiten aus dem 1PL-Modell für die Linkitems in der Kompetenzdomäne Naturwissenschaften

| Index | Item     | Item-<br>gruppe | inv. | 2006<br>PBA | 2009<br>PBA | 2012<br>PBA | 2015<br>CBA | 2014<br>PBA vs.<br>CBA |
|-------|----------|-----------------|------|-------------|-------------|-------------|-------------|------------------------|
| 61    | S498Q03  | S2A             | X    | 0.63        | 1.03        | 0.91        | 0.66        | 0.63                   |
| 62    | S498Q04  | S2A             |      | -0.42       | -0.68       | -0.41       | -0.43       | -0.43                  |
| 63    | S510Q01T | S2B             |      | -0.06       |             |             | 0.27        | -0.31                  |
| 64    | S510Q04T | S2B             | X    | -0.20       |             |             | -0.61       | -0.54                  |
| 65    | S514Q02  | S2A             |      | -2.48       | -2.50       | -2.54       | -1.97       | -0.61                  |
| 66    | S514Q03  | S2A             |      | 0.46        | 0.15        | 0.15        | 0.18        | -0.19                  |
| 67    | S514Q04  | S2A             | X    | -0.49       | -0.68       | -0.85       | -0.58       | -0.16                  |
| 68    | S519Q01  | S2A             | X    | 0.55        | 0.11        | 0.71        | 0.95        | -0.28                  |
| 69    | S519Q02T | S2A             | X    | -0.33       | -0.56       | -0.58       | -0.13       | -0.10                  |
| 70    | S519Q03  | S2A             | X    | 0.84        | -0.16       | 1.21        | 0.74        | 0.35                   |
| 71    | S521Q02  | S2A             | X    | -0.34       | -0.46       | -0.53       | -0.43       | -0.21                  |
| 72    | S521Q06  | S2A             | X    | -3.05       | -2.84       | -2.88       | -3.13       | 0.00                   |
| 73    | S524Q06T | S2B             |      | -1.09       |             |             | -1.18       | -0.81                  |
| 74    | S524Q07  | S2B             | X    | 1.01        |             |             | 0.58        | -0.13                  |
| 75    | S527Q01T | S2A             |      | 1.74        | 1.75        | 1.67        | 2.03        | -0.80                  |
| 76    | S527Q03T | S2A             | X    | -0.29       | -0.28       | -0.60       | -0.41       | -0.63                  |
| 77    | S527Q04T | S2A             | X    | -0.57       | -0.51       | -0.79       | -0.67       | -0.12                  |

Anmerkungen. Index = laufende Nummer, inv. = invariantes Item (laut OECD), PBA = papierbasierte Administration, CBA = computerbasierte Administration.

*Tabelle A3.* Linkitems für Mathematik mit in den verschiedenen PISA-Erhebungen verwendeten Itembezeichnungen

| Index | Item     | 2003     | 2006     | 2009     | 2012      | 2015      | 2014      |
|-------|----------|----------|----------|----------|-----------|-----------|-----------|
| 1     | M00GQ01  |          |          |          | PM00GQ01  | CM00GQ01S | DM00GQ01C |
| 2     | M00KQ02  |          |          |          | PM00KQ02  | DM00KQ02C | DM00KQ02C |
| 3     | M033Q01  | M033Q01  | M033Q01  | M033Q01  | PM033Q01  | CM033Q01S | DM033Q01C |
| 4     | M034Q01T | M034Q01T | M034Q01T | M034Q01T | PM034Q01T | CM034Q01S | DM034Q01C |
| 5     | M155Q01  | M155Q01  | M155Q01  | M155Q01  | PM155Q01  | CM155Q01S | DM155Q01C |
| 6     | M155Q02D | M155Q02T | M155Q02T | M155Q02D | PM155Q02D | DM155Q02C | DM155Q02C |
| 7     | M155Q03D | M155Q03T | M155Q03T | M155Q03D | PM155Q03D | DM155Q03C | DM155Q03C |
| 8     | M155Q04T | M155Q04T | M155Q04T | M155Q04T | PM155Q04T | CM155Q04S | DM155Q04C |
| 9     | M273Q01T | M273Q01T | M273Q01T | M273Q01T | PM273Q01T | CM273Q01S | DM273Q01C |
| 10    | M406Q01  | M406Q01  | M406Q01  | M406Q01  | PM406Q01  | DM406Q01C | DM406Q01C |
| 11    | M406Q02  | M406Q02  | M406Q02  | M406Q02  | PM406Q02  | DM406Q02C | DM406Q02C |
| 12    | M408Q01T | M408Q01T | M408Q01T | M408Q01T | PM408Q01T | CM408Q01S | DM408Q01C |
| 13    | M411Q01  | M411Q01  | M411Q01  | M411Q01  | PM411Q01  | CM411Q01S | DM411Q01C |
| 14    | M411Q02  | M411Q02  | M411Q02  | M411Q02  | PM411Q02  | CM411Q02S | DM411Q02C |
| 15    | M420Q01T | M420Q01T | M420Q01T | M420Q01T | PM420Q01T | CM420Q01S | DM420Q01C |
| 16    | M423Q01  | M423Q01  | M423Q01  | M423Q01  | PM423Q01  | CM423Q01S | DM423Q01C |
| 17    | M442Q02  | M442Q02  | M442Q02  | M442Q02  | PM442Q02  | CM442Q02S | DM442Q02C |
| 18    | M446Q01  | M446Q01  | M446Q01  | M446Q01  | PM446Q01  | CM446Q01S | DM446Q01C |
| 19    | M447Q01  | M447Q01  | M447Q01  | M447Q01  | PM447Q01  | CM447Q01S | DM447Q01C |
| 20    | M462Q01D | M462Q01T | M462Q01T | M462Q01D | PM462Q01D | DM462Q01C | DM462Q01C |
| 21    | M464Q01T | M464Q01T | M464Q01T | M464Q01T | PM464Q01T | CM464Q01S | DM464Q01C |
| 22    | M474Q01  | M474Q01  | M474Q01  | M474Q01  | PM474Q01  | CM474Q01S | DM474Q01C |
| 23    | M496Q01T | M496Q01T | M496Q01T | M496Q01T | PM496Q01T | CM496Q01S | DM496Q01C |
| 24    | M496Q02  | M496Q02  | M496Q02  | M496Q02  | PM496Q02  | CM496Q02S | DM496Q02C |
| 25    | M559Q01  | M559Q01  | M559Q01  | M559Q01  | PM559Q01  | CM559Q01S | DM559Q01C |
| 26    | M564Q01  | M564Q01  | M564Q01  | M564Q01  | PM564Q01  | CM564Q01S | DM564Q01C |
| 27    | M564Q02  | M564Q02  | M564Q02  | M564Q02  | PM564Q02  | CM564Q02S | DM564Q02C |
| 28    | M571Q01  | M571Q01  | M571Q01  | M571Q01  | PM571Q01  | CM571Q01S | DM571Q01C |
| 29    | M603Q01T | M603Q01T | M603Q01T | M603Q01T | PM603Q01T | CM603Q01S | DM603Q01C |
| 30    | M800Q01  | M800Q01  | M800Q01  | M800Q01  | PM800Q01  | CM800Q01S | DM800Q01C |
| 31    | M803Q01T | M803Q01T | M803Q01T | M803Q01T | PM803Q01T | CM803Q01S | DM803Q01C |
| 32    | M828Q02  | M828Q02  | M828Q02  | M828Q02  | PM828Q02  | DM828Q02C | DM828Q02C |
| 33    | M828Q03  | M828Q03  | M828Q03  | M828Q03  | PM828Q03  | CM828Q03S | DM828Q03C |

*Anmerkungen.* Index = laufende Nummer.



*Fortsetzung Tabelle A3.* Linkitems für Mathematik mit in den verschiedenen PISA-Erhebungen verwendeten Itembezeichnungen

| Index | Item     | 2003 | 2006 | 2009 | 2012      | 2015      | 2014      |
|-------|----------|------|------|------|-----------|-----------|-----------|
| 34    | M905Q01T |      |      |      | PM905Q01T | CM905Q01S | DM905Q01C |
| 35    | M905Q02  |      |      |      | PM905Q02  | DM905Q02C | DM905Q02C |
| 36    | M906Q01  |      |      |      | PM906Q01  | CM906Q01S | DM906Q01C |
| 37    | M906Q02  |      |      |      | PM906Q02  | DM906Q02C | DM906Q02C |
| 38    | M909Q01  |      |      |      | PM909Q01  | CM909Q01S | DM909Q01C |
| 39    | M909Q02  |      |      |      | PM909Q02  | CM909Q02S | DM909Q02C |
| 40    | M909Q03  |      |      |      | PM909Q03  | CM909Q03S | DM909Q03C |
| 41    | M915Q01  |      |      |      | PM915Q01  | CM915Q01S | DM915Q01C |
| 42    | M915Q02  |      |      |      | PM915Q02  | CM915Q02S | DM915Q02C |
| 43    | M919Q01  |      |      |      | PM919Q01  | CM919Q01S | DM919Q01C |
| 44    | M919Q02  |      |      |      | PM919Q02  | CM919Q02S | DM919Q02C |
| 45    | M943Q01  |      |      |      | PM943Q01  | CM943Q01S | DM943Q01C |
| 46    | M949Q01T |      |      |      | PM949Q01T | CM949Q01S | DM949Q01C |
| 47    | M949Q02T |      |      |      | PM949Q02T | CM949Q02S | DM949Q02C |
| 48    | M949Q03  |      |      |      | PM949Q03  | DM949Q03C | DM949Q03C |
| 49    | M953Q02  |      |      |      | PM953Q02  | DM953Q02C | DM953Q02C |
| 50    | M953Q03  |      |      |      | PM953Q03  | CM953Q03S | DM953Q03C |
| 51    | M953Q04D |      |      |      | PM953Q04D | DM953Q04C | DM953Q04C |
| 52    | M954Q01  |      |      |      | PM954Q01  | CM954Q01S | DM954Q01C |
| 53    | M954Q02  |      |      |      | PM954Q02  | DM954Q02C | DM954Q02C |
| 54    | M954Q04  |      |      |      | PM954Q04  | CM954Q04S | DM954Q04C |
| 55    | M955Q01  |      |      |      | PM955Q01  | DM955Q01C | DM955Q01C |
| 56    | M955Q02  |      |      |      | PM955Q02  | DM955Q02C | DM955Q02C |
| 57    | M955Q03  |      |      |      | PM955Q03  | CM955Q03S | DM955Q03C |
| 58    | M982Q01  |      |      |      | PM982Q01  | CM982Q01S | DM982Q01C |
| 59    | M982Q02  |      |      |      | PM982Q02  | CM982Q02S | DM982Q02C |
| 60    | M982Q03T |      |      |      | PM982Q03T | CM982Q03S | DM982Q03C |
| 61    | M982Q04  |      |      |      | PM982Q04  | CM982Q04S | DM982Q04C |
| 62    | M992Q01  |      |      |      | PM992Q01  | CM992Q01S | DM992Q01C |
| 63    | M992Q02  |      |      |      | PM992Q02  | CM992Q02S | DM992Q02C |
| 64    | M992Q03  |      |      |      | PM992Q03  | DM992Q03C | DM992Q03C |
| 65    | M998Q02  |      |      |      | PM998Q02  | DM998Q02C | DM998Q02C |
| 66    | M998Q04T |      |      |      | PM998Q04T | CM998Q04S | DM998Q04C |

*Anmerkungen.* Index = laufende Nummer.

*Tabelle A4.* Mittlere Itemschwierigkeiten aus dem 1PL-Modell für die Linkitems in der Kompetenzdomäne Mathematik

| Index | Item     | Item-<br>gruppe | inv. | 2003<br>PBA | 2006<br>PBA | 2009<br>PBA | 2012<br>PBA | 2015<br>CBA | 2014<br>PBA vs.<br>CBA |
|-------|----------|-----------------|------|-------------|-------------|-------------|-------------|-------------|------------------------|
| 1     | M00GQ01  | M2A             | X    |             |             |             | 2.65        | 3.36        | -0.53                  |
| 2     | M00KQ02  | M2A             | X    |             |             |             | 1.78        | 2.49        | 0.66                   |
| 3     | M033Q01  | M1A             | X    | -1.64       | -1.71       | -1.59       | -1.82       | -1.89       | 0.18                   |
| 4     | M034Q01T | M1A             |      | 0.50        | 0.21        | 0.12        | 0.23        | 0.33        | 0.00                   |
| 5     | M155Q01  | M1A             |      | -0.65       | -0.88       | -0.92       | -0.98       | -1.15       | -0.87                  |
| 6     | M155Q02D | M1A             | X    | -0.43       | -0.67       | -0.68       | -0.76       | -0.69       | -0.19                  |
| 7     | M155Q03D | M1A             | X    | 1.70        | 1.45        | 1.49        | 1.42        | 1.32        | -0.33                  |
| 8     | M155Q04T | M1A             | X    | -0.24       | -0.40       | -0.27       | -0.36       | -0.12       | -0.08                  |
| 9     | M273Q01T | M1A             |      | -0.48       | -0.21       | -0.50       | -0.36       | 0.42        | -0.98                  |
| 10    | M406Q01  | M1A             |      | 1.51        | 0.98        | 0.92        | 1.06        | 1.11        | -0.15                  |
| 11    | M406Q02  | M1A             |      | 2.18        | 1.76        | 1.69        | 1.86        | 2.47        | -1.14                  |
| 12    | M408Q01T | M1A             |      | 0.74        | 0.12        | 0.07        | 0.04        | 0.12        | 0.01                   |
| 13    | M411Q01  | M1A             | X    | 0.09        | 0.02        | -0.33       | -0.20       | -0.03       | -0.17                  |
| 14    | M411Q02  | M1A             | X    | 0.50        | 0.27        | 0.21        | 0.12        | 0.05        | 0.65                   |
| 15    | M420Q01T | M1A             | X    | 0.26        | 0.30        | -0.16       | -0.02       | 0.16        | -0.12                  |
| 16    | M423Q01  | M1A             | X    | -1.51       | -1.40       | -1.62       | -1.87       | -1.89       | 0.26                   |
| 17    | M442Q02  | M1A             |      | 0.39        | 0.43        | 0.59        | 0.53        | 1.21        | -0.82                  |
| 18    | M446Q01  | M1A             | X    | -0.40       | -0.62       | -0.72       | -0.79       | -0.47       | 0.17                   |
| 19    | M447Q01  | M1A             |      | -1.09       | -1.39       | -1.18       | -1.35       | -1.01       | 0.51                   |
| 20    | M462Q01D | M1A             | X    | 2.21        | 2.03        | 2.20        | 2.21        | 0.30        | -0.36                  |
| 21    | M464Q01T | M1A             | X    | 1.37        | 1.14        | 1.00        | 0.96        | 1.08        | -0.08                  |
| 22    | M474Q01  | M1A             |      | -1.67       | -1.63       | -1.65       | -1.50       | -1.09       | -0.08                  |
| 23    | M496Q01T | M1A             |      | -0.32       | -0.01       | -0.19       | -0.29       | -0.07       | -0.41                  |
| 24    | M496Q02  | M1A             |      | -1.06       | -0.88       | -0.85       | -1.10       | -0.94       | 0.63                   |
| 25    | M559Q01  | M1A             | X    | -0.66       | -1.01       | -0.79       | -0.89       | -0.51       | 0.03                   |
| 26    | M564Q01  | M1A             | X    | 0.03        | -0.18       | -0.04       | -0.07       | -0.09       | -0.37                  |
| 27    | M564Q02  | M1A             | X    | 0.29        | 0.09        | 0.23        | 0.10        | 0.01        | -0.46                  |
| 28    | M571Q01  | M1A             |      | -0.16       | -0.33       | -0.21       | -0.31       | -0.08       | -0.01                  |
| 29    | M603Q01T | M1A             |      | -0.49       | -0.36       | -0.32       | -0.41       | 0.23        | -0.49                  |
| 30    | M800Q01  | M1A             | X    | -2.92       | -2.56       | -2.41       | -2.23       | -2.07       | -0.08                  |
| 31    | M803Q01T | M1A             |      | 1.51        | 1.19        | 1.06        | 0.85        | 1.06        | 0.25                   |
| 32    | M828Q02  | M1A             |      | -0.23       | -0.01       | -0.12       | -0.50       | -0.69       | 0.54                   |
| 33    | M828Q03  | M1A             | X    | 0.92        | 0.85        | 0.64        | 0.73        | 0.66        | 0.86                   |

*Anmerkungen.* Index = laufende Nummer, inv. = invariantes Item (laut OECD), PBA = papierbasierte Administration, CBA = computerbasierte Administration.

Fortsetzung Tabelle A4. Mittlere Itemschwierigkeiten aus dem 1PL-Modell für die Linkitems in der Kompetenzdomäne Mathematik

| Index | Item     | Item-<br>gruppe | inv. | 2003<br>PBA | 2006<br>PBA | 2009<br>PBA | 2012<br>PBA | 2015<br>CBA | 2014<br>PBA vs.<br>CBA |
|-------|----------|-----------------|------|-------------|-------------|-------------|-------------|-------------|------------------------|
| 34    | M905Q01T | M2A             |      |             |             |             | -1.76       | -1.52       | -0.31                  |
| 35    | M905Q02  | M2A             |      |             |             |             | -0.32       | 0.60        | -0.87                  |
| 36    | M906Q01  | M2A             | X    |             |             |             | -0.90       | -0.53       | 0.13                   |
| 37    | M906Q02  | M2A             | X    |             |             |             | 0.11        | 0.25        | -0.18                  |
| 38    | M909Q01  | M2A             |      |             |             |             | -2.88       | -2.14       | -0.33                  |
| 39    | M909Q02  | M2A             |      |             |             |             | -1.16       | -0.75       | -0.45                  |
| 40    | M909Q03  | M2A             |      |             |             |             | 0.34        | 0.66        | -0.55                  |
| 41    | M915Q01  | M2A             | X    |             |             |             | 1.02        | 0.92        | 0.07                   |
| 42    | M915Q02  | M2A             | X    |             |             |             | -1.64       | -1.10       | -0.77                  |
| 43    | M919Q01  | M2A             |      |             |             |             | -2.59       | -2.59       | 0.50                   |
| 44    | M919Q02  | M2A             | X    |             |             |             | 0.19        | 0.09        | 0.42                   |
| 45    | M943Q01  | M2A             | X    |             |             |             | -0.06       | -0.12       | 0.31                   |
| 46    | M949Q01T | M2A             | X    |             |             |             | -1.16       | -0.95       | 0.49                   |
| 47    | M949Q02T | M2A             | X    |             |             |             | 1.35        | 1.42        | -0.10                  |
| 48    | M949Q03  | M2A             | X    |             |             |             | 0.76        | 0.93        | -0.30                  |
| 49    | M953Q02  | M2A             |      |             |             |             | -0.01       | 0.37        | -0.54                  |
| 50    | M953Q03  | M2A             |      |             |             |             | -0.24       | -0.26       | -0.10                  |
| 51    | M953Q04D | M2A             |      |             |             |             | 1.47        | 1.58        | -0.21                  |
| 52    | M954Q01  | M2A             | X    |             |             |             | -1.00       | -0.73       | -0.66                  |
| 53    | M954Q02  | M2A             | X    |             |             |             | 0.32        | 0.41        | -0.58                  |
| 54    | M954Q04  | M2A             | X    |             |             |             | 0.80        | 0.86        | 0.06                   |
| 55    | M955Q01  | M2A             | X    |             |             |             | -1.57       | -1.50       | -0.62                  |
| 56    | M955Q02  | M2A             | X    |             |             |             | 0.82        | 0.58        | -0.07                  |
| 57    | M955Q03  | M2A             |      |             |             |             | 1.84        | 1.98        | -0.28                  |
| 58    | M982Q01  | M2A             |      |             |             |             | -2.60       | -2.11       | 0.16                   |
| 59    | M982Q02  | M2A             | X    |             |             |             | 1.24        | 0.97        | -0.08                  |
| 60    | M982Q03T | M2A             |      |             |             |             | -1.05       | -0.79       | -0.25                  |
| 61    | M982Q04  | M2A             |      |             |             |             | -0.48       | -0.16       | -0.68                  |
| 62    | M992Q01  | M2A             |      |             |             |             | -2.05       | -1.52       | -0.90                  |
| 63    | M992Q02  | M2A             |      |             |             |             | 2.10        | 2.61        | 0.11                   |
| 64    | M992Q03  | M2A             | X    |             |             |             | 2.85        | 3.27        | -0.86                  |
| 65    | M998Q02  | M2A             | X    |             |             |             | -1.33       | -1.26       | -0.50                  |
| 66    | M998Q04T | M2A             | X    |             |             |             | 0.35        | 0.48        | -0.80                  |

Anmerkungen. Index = laufende Nummer, inv. = invariantes Item (laut OECD), PBA = papierbasierte Administration, CBA = computerbasierte Administration.

*Tabelle A5.* Linkitems für Lesen mit in den verschiedenen PISA-Erhebungen verwendeten Itembezeichnungen

| Index | Item     | 2000     | 2003     | 2006     | 2009     | 2012      | 2015       | 2014       |
|-------|----------|----------|----------|----------|----------|-----------|------------|------------|
| 1     | R055Q01  | R055Q01  | R055Q01  | R055Q01  | R055Q01  |           | CR055Q01S  | DR055Q01C  |
| 2     | R055Q02  | R055Q02  | R055Q02  | R055Q02  | R055Q02  |           | DR055Q02C  | DR055Q02C  |
| 3     | R055Q05  | R055Q05  | R055Q05  | R055Q05  | R055Q05  |           | DR055Q05C  | DR055Q05C  |
| 4     | R067Q01  | R067Q01  | R067Q01  | R067Q01  | R067Q01  |           | CR067Q01S  | DR067Q01C  |
| 5     | R067Q04  | R067Q04  | R067Q04  | R067Q04  | R067Q04  |           | DR067Q04C  | DR067Q04C  |
| 6     | R067Q05  | R067Q05  | R067Q05  | R067Q05  | R067Q05  |           | DR067Q05C  | DR067Q05C  |
| 7     | R083Q01  | R083Q01  |          |          | R083Q01  |           | CR083Q01S  | DR083Q01C  |
| 8     | R083Q02  | R083Q02  |          |          | R083Q02  |           | CR083Q02S  | DR083Q02C  |
| 9     | R083Q03  | R083Q03  |          |          | R083Q03  |           | CR083Q03S  | DR083Q03C  |
| 10    | R083Q04  | R083Q04  |          |          | R083Q04  |           | CR083Q04S  | DR083Q04C  |
| 11    | R101Q01  | R101Q01  |          |          | R101Q01  |           | CR101Q01S  | DR101Q01C  |
| 12    | R101Q02  | R101Q02  |          |          | R101Q02  |           | CR101Q02S  | DR101Q02C  |
| 13    | R101Q03  | R101Q03  |          |          | R101Q03  |           | CR101Q03S  | DR101Q03C  |
| 14    | R101Q04  | R101Q04  |          |          | R101Q04  |           | CR101Q04S  | DR101Q04C  |
| 15    | R101Q05  | R101Q05  |          |          | R101Q05  |           | CR101Q05S  | DR101Q05C  |
| 16    | R102Q04A | R102Q04A | R102Q04A | R102Q04A | R102Q04A |           | DR102Q04C  | DR102Q04C  |
| 17    | R102Q05  | R102Q05  | R102Q05  | R102Q05  | R102Q05  |           | DR102Q05C  | DR102Q05C  |
| 18    | R102Q07  | R102Q07  | R102Q07  | R102Q07  | R102Q07  |           | CR102Q07S  | DR102Q07C  |
| 19    | R104Q01  | R104Q01  | R104Q01  | R104Q01  | R104Q01  |           | CR104Q01S  | DR104Q01C  |
| 20    | R104Q02  | R104Q02  | R104Q02  | R104Q02  | R104Q02  |           | CR104Q02S  | DR104Q02C  |
| 21    | R104Q05  | R104Q05  | R104Q05  | R104Q05  | R104Q05  |           | CR104Q05S  | DR104Q05C  |
| 22    | R111Q01  | R111Q01  | R111Q01  | R111Q01  | R111Q01  |           | CR111Q01S  | DR111Q01C  |
| 23    | R111Q02B | R111Q02B | R111Q02B | R111Q02B | R111Q02B |           | DR111Q02BC | DR111Q02BC |
| 24    | R111Q06B | R111Q06B | R111Q06B | R111Q06B | R111Q06B |           | DR111Q06C  | DR111Q06C  |
| 25    | R220Q01  | R220Q01  | R220Q01  | R220Q01  | R220Q01  | PR220Q01  | CR220Q01S  | DR220Q01C  |
| 26    | R220Q02B | R220Q02B | R220Q02B | R220Q02B | R220Q02B | PR220Q02B | CR220Q02S  | DR220Q02C  |
| 27    | R220Q04  | R220Q04  | R220Q04  | R220Q04  | R220Q04  | PR220Q04  | CR220Q04S  | DR220Q04C  |
| 28    | R220Q05  | R220Q05  | R220Q05  | R220Q05  | R220Q05  |           | CR220Q05S  | DR220Q05C  |
| 29    | R220Q06  | R220Q06  | R220Q06  | R220Q06  | R220Q06  |           | CR220Q06S  | DR220Q06C  |
| 30    | R227Q01  | R227Q01  | R227Q01  | R227Q01  | R227Q01  |           | CR227Q01S  | DR227Q01C  |

*Anmerkungen.* Index = laufende Nummer.

*Fortsetzung Tabelle A5.* Linkitems für Lesen mit in den verschiedenen PISA-Erhebungen verwendeten Itembezeichnungen

| Index | Item     | 2000     | 2003     | 2006     | 2009     | 2012      | 2015       | 2014       |
|-------|----------|----------|----------|----------|----------|-----------|------------|------------|
| 31    | R227Q02T | R227Q02T | R227Q02T | R227Q02T | R227Q02T |           | CR227Q02S  | DR227Q02C  |
| 32    | R227Q03  | R227Q03  | R227Q03  | R227Q03  | R227Q03  |           | DR227Q03C  | DR227Q03C  |
| 33    | R227Q06  | R227Q06  | R227Q06  | R227Q06  | R227Q06  |           | DR227Q06C  | DR227Q06C  |
| 34    | R245Q01  | R245Q01  |          |          | R245Q01  |           | CR245Q01S  | DR245Q01C  |
| 35    | R245Q02  | R245Q02  |          |          | R245Q02  |           | CR245Q02S  | DR245Q02C  |
| 36    | R404Q03  |          |          |          | R404Q03  | PR404Q03  | CR404Q03S  | DR404Q03C  |
| 37    | R404Q06  |          |          |          | R404Q06  | PR404Q06  | CR404Q06S  | DR404Q06C  |
| 38    | R404Q07T |          |          |          | R404Q07T | PR404Q07T | CR404Q07S  | DR404Q07C  |
| 39    | R404Q10A |          |          |          | R404Q10A | PR404Q10A | DR404Q10AC | DR404Q10AC |
| 40    | R404Q10B |          |          |          | R404Q10B | PR404Q10B | DR404Q10BC | DR404Q10BC |
| 41    | R406Q01  |          |          |          | R406Q01  | PR406Q01  | DR406Q01C  | DR406Q01C  |
| 42    | R406Q02  |          |          |          | R406Q02  | PR406Q02  | DR406Q02C  | DR406Q02C  |
| 43    | R406Q05  |          |          |          | R406Q05  | PR406Q05  | DR406Q05C  | DR406Q05C  |
| 44    | R412Q01  |          |          |          | R412Q01  | PR412Q01  | CR412Q01S  | DR412Q01C  |
| 45    | R412Q05  |          |          |          | R412Q05  | PR412Q05  | CR412Q05S  | DR412Q05C  |
| 46    | R412Q06T |          |          |          | R412Q06T | PR412Q06T | CR412Q06S  | DR412Q06C  |
| 47    | R412Q08  |          |          |          | R412Q08  | PR412Q08  | DR412Q08C  | DR412Q08C  |
| 48    | R420Q02  |          |          |          | R420Q02  | PR420Q02  | DR420Q02C  | DR420Q02C  |
| 49    | R420Q06  |          |          |          | R420Q06  | PR420Q06  | DR420Q06C  | DR420Q06C  |
| 50    | R420Q09  |          |          |          | R420Q09  | PR420Q09  | DR420Q09C  | DR420Q09C  |
| 51    | R420Q10  |          |          |          | R420Q10  | PR420Q10  | DR420Q10C  | DR420Q10C  |
| 52    | R424Q02T |          |          |          | R424Q02T | PR424Q02T | CR424Q02S  | DR424Q02C  |
| 53    | R424Q03  |          |          |          | R424Q03  | PR424Q03  | CR424Q03S  | DR424Q03C  |
| 54    | R424Q07  |          |          |          | R424Q07  | PR424Q07  | CR424Q07S  | DR424Q07C  |
| 55    | R432Q01  |          |          |          | R432Q01  | PR432Q01  | DR432Q01C  | DR432Q01C  |
| 56    | R432Q05  |          |          |          | R432Q05  | PR432Q05  | DR432Q05C  | DR432Q05C  |
| 57    | R432Q06T |          |          |          | R432Q06T | PR432Q06T | CR432Q06S  | DR432Q06C  |
| 58    | R437Q01  |          |          |          | R437Q01  | PR437Q01  | CR437Q01S  | DR437Q01C  |
| 59    | R437Q06  |          |          |          | R437Q06  | PR437Q06  | CR437Q06S  | DR437Q06C  |
| 60    | R437Q07  |          |          |          | R437Q07  | PR437Q07  | DR437Q07C  | DR437Q07C  |

*Anmerkungen.* Index = laufende Nummer.

*Fortsetzung Tabelle A5.* Linkitems für Lesen mit in den verschiedenen PISA-Erhebungen verwendeten Itembezeichnungen

| Index | Item     | 2000 | 2003 | 2006 | 2009     | 2012      | 2015      | 2014      |
|-------|----------|------|------|------|----------|-----------|-----------|-----------|
| 61    | R442Q02  |      |      |      | R442Q02  |           | DR442Q02C | DR442Q02C |
| 62    | R442Q03  |      |      |      | R442Q03  |           | DR442Q03C | DR442Q03C |
| 63    | R442Q05  |      |      |      | R442Q05  |           | DR442Q05C | DR442Q05C |
| 64    | R442Q06  |      |      |      | R442Q06  |           | DR442Q06C | DR442Q06C |
| 65    | R442Q07  |      |      |      | R442Q07  |           | CR442Q07S | DR442Q07C |
| 66    | R446Q03  |      |      |      | R446Q03  | PR446Q03  | CR446Q03S | DR446Q03C |
| 67    | R446Q06  |      |      |      | R446Q06  | PR446Q06  | DR446Q06C | DR446Q06C |
| 68    | R453Q01  |      |      |      | R453Q01  | PR453Q01  | CR453Q01S | DR453Q01C |
| 69    | R453Q04  |      |      |      | R453Q04  | PR453Q04  | DR453Q04C | DR453Q04C |
| 70    | R453Q05T |      |      |      | R453Q05T | PR453Q05T | CR453Q05S | DR453Q05C |
| 71    | R453Q06  |      |      |      | R453Q06  | PR453Q06  | DR453Q06C | DR453Q06C |
| 72    | R455Q02  |      |      |      | R455Q02  | PR455Q02  | DR455Q02C | DR455Q02C |
| 73    | R455Q03  |      |      |      | R455Q03  | PR455Q03  | DR455Q03C | DR455Q03C |
| 74    | R455Q04  |      |      |      | R455Q04  | PR455Q04  | CR455Q04S | DR455Q04C |
| 75    | R456Q02  |      |      |      | R456Q02  | PR456Q02  | DR456Q02C | DR456Q02C |
| 76    | R456Q06  |      |      |      | R456Q06  | PR456Q06  | DR456Q06C | DR456Q06C |
| 77    | R460Q01  |      |      |      | R460Q01  |           | DR460Q01C | DR460Q01C |
| 78    | R460Q05  |      |      |      | R460Q05  |           | CR460Q05S | DR460Q05C |
| 79    | R460Q06  |      |      |      | R460Q06  |           | CR460Q06S | DR460Q06C |
| 80    | R466Q02  |      |      |      | R466Q02  | PR466Q02  | DR466Q02C | DR466Q02C |
| 81    | R466Q03T |      |      |      | R466Q03T | PR466Q03T | CR466Q03S | DR466Q03C |
| 82    | R466Q06  |      |      |      | R466Q06  | PR466Q06  | CR466Q06S | DR466Q06C |

*Anmerkungen.* Index = laufende Nummer.

*Tabelle A6.* Mittlere Itemschwierigkeiten aus dem 1PL-Modell für die Linkitems in der Kompetenzdomäne Lesen

| Index | Item     | Item-<br>gruppe | inv. | 2000<br>PBA | 2003<br>PBA | 2006<br>PBA | 2009<br>PBA | 2012<br>PBA | 2015<br>CBA | 2014<br>PBA vs.<br>CBA |
|-------|----------|-----------------|------|-------------|-------------|-------------|-------------|-------------|-------------|------------------------|
| 1     | R055Q01  | R1A             |      | -1.47       | -1.37       | -1.70       | -1.80       |             | -1.95       | 0.28                   |
| 2     | R055Q02  | R1A             | X    | -0.29       | 0.20        | -0.04       | -0.25       |             | -0.27       | 0.04                   |
| 3     | R055Q05  | R1A             |      | -1.30       | -0.99       | -1.05       | -1.35       |             | -1.10       | -0.42                  |
| 4     | R067Q01  | R1A             | X    | -1.99       | -3.04       | -2.99       | -2.95       |             | -2.87       | -0.47                  |
| 5     | R067Q04  | R1A             | X    | 0.21        | 0.03        | 0.25        | -0.04       |             | -0.45       | -0.15                  |
| 6     | R067Q05  | R1A             | X    | -0.14       | -0.39       | -0.52       | -0.78       |             | -1.11       | 0.23                   |
| 7     | R083Q01  | R1B             | X    | -0.75       |             |             | -0.60       |             | -0.71       | -0.32                  |
| 8     | R083Q02  | R1B             |      | -1.78       |             |             | -1.92       |             | -1.37       | -0.71                  |
| 9     | R083Q03  | R1B             |      | -1.47       |             |             | -1.59       |             | -1.35       | -0.36                  |
| 10    | R083Q04  | R1B             | X    | -0.33       |             |             | -0.57       |             | -0.69       | 0.27                   |
| 11    | R101Q01  | R1B             | X    | -0.07       |             |             | -0.24       |             | -0.19       | -0.56                  |
| 12    | R101Q02  | R1B             | X    | -1.88       |             |             | -2.03       |             | -2.37       | -0.63                  |
| 13    | R101Q03  | R1B             | X    | -0.78       |             |             | -0.89       |             | -1.11       | 0.22                   |
| 14    | R101Q04  | R1B             | X    | -1.35       |             |             | -1.39       |             | -1.80       | -0.37                  |
| 15    | R101Q05  | R1B             |      | 0.51        |             |             | 0.29        |             | 0.10        | -0.19                  |
| 16    | R102Q04A | R1A             |      | 0.23        | 0.64        | 0.59        | 0.32        |             | 0.58        | -0.14                  |
| 17    | R102Q05  | R1A             |      | 0.86        | 0.60        | 0.68        | 0.34        |             | 0.81        | -0.19                  |
| 18    | R102Q07  | R1A             | X    | -1.37       | -1.11       | -1.28       | -1.69       |             | -1.92       | 0.35                   |
| 19    | R104Q01  | R1A             |      | -1.47       | -1.97       | -2.04       | -1.72       |             | -0.52       | -2.01                  |
| 20    | R104Q02  | R1A             | X    | 1.30        | 2.25        | 2.46        | 1.96        |             | 1.50        | 0.29                   |
| 21    | R104Q05  | R1A             |      | 1.93        | 2.32        | 2.32        | 2.11        |             | 2.91        | -0.81                  |
| 22    | R111Q01  | R1A             | X    | -0.63       | -0.82       | -1.00       | -1.14       |             | -1.36       | 0.42                   |
| 23    | R111Q02B | R1A             | X    | 0.86        | 1.04        | 0.73        | 0.69        |             | 0.31        | -0.43                  |
| 24    | R111Q06B | R1A             | X    | 0.62        | 0.99        | 0.58        | 0.43        |             | -0.12       | 0.24                   |
| 25    | R220Q01  | R1A             |      | 0.27        | 0.33        | 0.60        | 0.34        | 0.67        | 1.63        | -2.04                  |
| 26    | R220Q02B | R1A             |      | -0.66       | -0.67       | -0.68       | -0.88       | -0.71       | -0.17       | -0.93                  |
| 27    | R220Q04  | R1A             | X    | -0.51       | -0.69       | -0.76       | -0.89       | -0.78       | -1.11       | -0.36                  |
| 28    | R220Q05  | R1A             | X    | -1.65       | -1.95       | -2.12       | -2.17       |             | -2.17       | -1.21                  |
| 29    | R220Q06  | R1A             |      | -0.74       | -1.21       | -1.31       | -1.56       |             | -1.43       | -1.31                  |
| 30    | R227Q01  | R1A             |      | -0.36       | -0.08       | -0.29       | -0.67       |             | -0.94       | 1.11                   |

*Anmerkungen.* Index = laufende Nummer, inv. = invariantes Item (laut OECD), PBA = papierbasierte Administration, CBA = computerbasierte Administration.

Fortsetzung Tabelle A6. Mittlere Itemschwierigkeiten aus dem 1PL-Modell für die Linkitems in der Kompetenzdomäne Lesen

| Index | Item     | Item-<br>gruppe | inv. | 2000<br>PBA | 2003<br>PBA | 2006<br>PBA | 2009<br>PBA | 2012<br>PBA | 2015<br>CBA | 2014<br>PBA vs.<br>CBA |
|-------|----------|-----------------|------|-------------|-------------|-------------|-------------|-------------|-------------|------------------------|
| 31    | R227Q02T | R1A             |      | -0.94       | -0.86       | -0.82       | -1.11       |             | -0.55       | -0.48                  |
| 32    | R227Q03  | R1A             | X    | 0.01        | 0.10        | -0.28       | -0.51       |             | -0.54       | -0.21                  |
| 33    | R227Q06  | R1A             | X    | -1.05       | -1.02       | -1.10       | -1.66       |             | -1.87       | 0.13                   |
| 34    | R245Q01  | R1B             |      | -1.81       |             |             | -1.37       |             | -1.43       | -0.50                  |
| 35    | R245Q02  | R1B             |      | -1.01       |             |             | -1.69       |             | -1.20       | -0.88                  |
| 36    | R404Q03  | R2A             | X    |             |             |             | -1.30       | -1.60       | -1.43       | 0.21                   |
| 37    | R404Q06  | R2A             | X    |             |             |             | 0.29        | 0.14        | 0.18        | -0.34                  |
| 38    | R404Q07T | R2A             |      |             |             |             | 0.03        | -0.28       | -0.03       | -0.10                  |
| 39    | R404Q10A | R2A             | X    |             |             |             | 0.50        | 0.19        | -0.22       | 0.55                   |
| 40    | R404Q10B | R2A             | X    |             |             |             | 0.66        | 0.96        | 0.06        | 0.57                   |
| 41    | R406Q01  | R2A             |      |             |             |             | -0.92       | -1.19       | -1.56       | 0.30                   |
| 42    | R406Q02  | R2A             |      |             |             |             | 1.61        | 1.40        | 1.49        | -0.74                  |
| 43    | R406Q05  | R2A             |      |             |             |             | -1.39       | -1.61       | -1.53       | 0.02                   |
| 44    | R412Q01  | R2A             | X    |             |             |             | -2.25       | -2.31       | -1.87       | 0.06                   |
| 45    | R412Q05  | R2A             | X    |             |             |             | -0.65       | -0.69       | -0.61       | -0.24                  |
| 46    | R412Q06T | R2A             | X    |             |             |             | 0.64        | 0.50        | 0.72        | -0.50                  |
| 47    | R412Q08  | R2A             | X    |             |             |             | 0.79        | 0.66        | 1.10        | -0.09                  |
| 48    | R420Q02  | R2A             |      |             |             |             | -2.86       | -3.00       | -2.43       | -0.64                  |
| 49    | R420Q06  | R2A             | X    |             |             |             | 0.08        | 0.20        | 0.23        | 0.13                   |
| 50    | R420Q09  | R2A             |      |             |             |             | -1.28       | -1.26       | -1.18       | 0.52                   |
| 51    | R420Q10  | R2A             |      |             |             |             | -1.24       | -1.46       | -0.71       | 0.24                   |
| 52    | R424Q02T | R2A             | X    |             |             |             | 0.15        | -0.19       | 0.27        | -0.59                  |
| 53    | R424Q03  | R2A             |      |             |             |             | -1.16       | -1.36       | -0.62       | -0.65                  |
| 54    | R424Q07  | R2A             | X    |             |             |             | -1.30       | -1.44       | -1.55       | 0.59                   |
| 55    | R432Q01  | R2A             | X    |             |             |             | -2.15       | -2.20       | -2.21       | -0.25                  |
| 56    | R432Q05  | R2A             | X    |             |             |             | -1.20       | -1.10       | -1.01       | -0.42                  |
| 57    | R432Q06T | R2A             |      |             |             |             | 2.98        | 2.96        | 3.06        | 0.41                   |
| 58    | R437Q01  | R2A             |      |             |             |             | -0.19       | -0.18       | 0.37        | -0.85                  |
| 59    | R437Q06  | R2A             | X    |             |             |             | -0.97       | -0.80       | -0.80       | 0.02                   |
| 60    | R437Q07  | R2A             | X    |             |             |             | 2.59        | 2.67        | 2.67        | 0.63                   |

Anmerkungen. Index = laufende Nummer, inv. = invariantes Item (laut OECD), PBA = papierbasierte Administration, CBA = computerbasierte Administration.



Fortsetzung Tabelle A6. Mittlere Itemschwierigkeiten aus dem 1PL-Modell für die Linkitems in der Kompetenzdomäne Lesen

| Index | Item     | Item-<br>gruppe | inv. | 2000<br>PBA | 2003<br>PBA | 2006<br>PBA | 2009<br>PBA | 2012<br>PBA | 2015<br>CBA | 2014<br>PBA vs.<br>CBA |
|-------|----------|-----------------|------|-------------|-------------|-------------|-------------|-------------|-------------|------------------------|
| 61    | R442Q02  | R2B             | X    |             |             |             | -0.65       |             | -0.74       | -0.12                  |
| 62    | R442Q03  | R2B             | X    |             |             |             | -0.55       |             | -0.66       | -0.42                  |
| 63    | R442Q05  | R2B             | X    |             |             |             | 0.95        |             | 1.02        | 0.00                   |
| 64    | R442Q06  | R2B             |      |             |             |             | 1.85        |             | 2.04        | 0.98                   |
| 65    | R442Q07  | R2B             | X    |             |             |             | 0.60        |             | 0.37        | 0.16                   |
| 66    | R446Q03  | R2A             | X    |             |             |             | -2.83       | -3.33       | -3.38       | -0.09                  |
| 67    | R446Q06  | R2A             |      |             |             |             | -1.65       | -1.60       | -1.61       | -0.09                  |
| 68    | R453Q01  | R2A             | X    |             |             |             | -1.55       | -1.76       | -1.46       | 0.33                   |
| 69    | R453Q04  | R2A             |      |             |             |             | -0.81       | -0.45       | -0.94       | 0.49                   |
| 70    | R453Q05T | R2A             |      |             |             |             | -1.16       | -1.19       | -0.87       | 0.06                   |
| 71    | R453Q06  | R2A             |      |             |             |             | -1.08       | -1.33       | -1.60       | 0.18                   |
| 72    | R455Q02  | R2A             | X    |             |             |             | 1.73        | 1.14        | 1.23        | -1.19                  |
| 73    | R455Q03  | R2A             | X    |             |             |             | -1.48       | -1.68       | -1.41       | -0.30                  |
| 74    | R455Q04  | R2A             |      |             |             |             | -0.19       | -0.17       | -0.14       | -0.27                  |
| 75    | R456Q02  | R2A             |      |             |             |             | -2.75       | -2.30       | -2.38       | -0.06                  |
| 76    | R456Q06  | R2A             |      |             |             |             | -2.05       | -1.99       | -1.43       | -0.80                  |
| 77    | R460Q01  | R2B             | X    |             |             |             | -0.12       |             | -0.72       | 0.24                   |
| 78    | R460Q05  | R2B             |      |             |             |             | -1.79       |             | -2.19       | 0.49                   |
| 79    | R460Q06  | R2B             | X    |             |             |             | -0.28       |             | -0.57       | -0.40                  |
| 80    | R466Q02  | R2A             | X    |             |             |             | 0.01        | -0.13       | -0.42       | -0.08                  |
| 81    | R466Q03T | R2A             | X    |             |             |             | 1.79        | 1.66        | 1.96        | 0.45                   |
| 82    | R466Q06  | R2A             | X    |             |             |             | -1.79       | -1.75       | -1.90       | 0.00                   |

Anmerkungen. Index = laufende Nummer, inv. = invariantes Item (laut OECD), PBA = papierbasierte Administration, CBA = computerbasierte Administration.

## B. Tabellarische Übersicht der verwendeten Skalierungsmethoden

Tabelle B1 zeigt einen tabellarischen Überblick der eingesetzten Linking-Verfahren des Artikels (siehe Abschnitt „Methode“ im Artikel).

*Tabelle B1.* Übersicht über verschiedene Linking-Verfahren der PISA-Erhebungen

|                                     | Methode | IRT-Modell |     | Skalierung |      | Linking |        |
|-------------------------------------|---------|------------|-----|------------|------|---------|--------|
|                                     |         | 1PL        | 2PL | konk.      | sep. | Haberm. | schrw. |
| ohne Feldtest<br>(alle Items)       | C1      | X          |     | X          |      |         |        |
|                                     | C2      |            | X   | X          |      |         |        |
|                                     | H1      | X          |     |            | X    | X       |        |
|                                     | H2      |            | X   |            | X    | X       |        |
|                                     | S1      | X          |     |            | X    |         | X      |
| ohne Feldtest<br>(invariante Items) | C1I     | X          |     | X          |      |         |        |
|                                     | C2I     |            | X   | X          |      |         |        |
|                                     | H1I     | X          |     |            | X    | X       |        |
|                                     | H2I     |            | X   |            | X    | X       |        |
| mit Feldtest                        | C1F     | X          |     | X          |      |         |        |
|                                     | H1F     | X          |     |            | X    | X       |        |
|                                     | S1F     | X          |     |            | X    |         | X      |

*Anmerkungen.* 1PL = 1PL-Modell; 2PL = 2PL-Modell; konk. = konkurrente Skalierung, sep. = separate Skalierung, Haberm. = Linking nach der Methode von Haberman, schrw. = schrittweises Linking. Ein Eintrag unter Linking erfolgt nur für die Methoden, für die eine separate Skalierung vorliegt.

### **C. Zusatzanalyse: Trendschätzung in Naturwissenschaften unter ausschließlicher Berücksichtigung der Items aus früheren PISA-Erhebungen**

In PISA 2015 wurden in der Kompetenzdomäne Naturwissenschaften neben Linkitems neue interaktiver gestaltete Items eingesetzt (siehe „Diskussion“ im Artikel). Es könnte sein, dass der Kontext dieser neuen Items die Itemschwierigkeiten der alten Items (Linkitems; über die Studien 2006 bis 2015 eingesetzte Items) verändert haben könnte (sog. Kontexteffekte).

In einer Zusatzanalyse wurden marginale Trendschätzungen für Deutschland unter Elimination möglicher Kontexteffekte der neuen Items ermittelt<sup>1</sup>. Das Testdesign in PISA 2015 besteht analog zu früheren Erhebungen aus vier Itemblöcken pro Testheft. Items der Kompetenzdomäne Naturwissenschaften wurden entweder an der ersten und zweiten oder der dritten und vierten Blockposition administriert. Itemblöcke in PISA 2015 bestanden entweder nur aus neuen oder nur aus alten Items. Um den Kontexteffekt neuer Items auf alte Items zu entfernen, wurden in der Zusatzanalyse nur Testhefte herangezogen, in denen alte Items an der ersten oder der dritten Position vorgelegt wurden. Neue Items wurden in diesen Testheften an der zweiten oder vierten Position eingesetzt. Insgesamt ergaben sich in der Zusatzanalyse damit 65 Testversionen mit alten Items an der ersten Position und 65 Testversionen mit alten Items an der dritten Position verwendet. Damit resultierten  $N = 1\,007$  Schülerinnen und Schüler an der ersten Position und  $N = 1\,075$  Schülerinnen und Schüler an der dritten Position.

Testhefte und Itemblöcke aus den früheren PISA-Erhebungen wurden so ausgewählt, dass eine möglichst große Ähnlichkeit des Designs für PISA 2015 der Zusatzanalyse resultierte. Demzufolge wurden Testhefte ausgewählt, für die Items in Naturwissenschaften an der ersten oder dritten Position vorgelegt wurden. Alle anderen Items wurden nicht weiter berücksichtigt. Lag Items in Naturwissenschaften an der ersten und der dritten Position in einer Testversion in einer PISA-Erhebung vor, so wurden Items nur für eine der Positionen in der Zusatzanalyse verwendet.

Für PISA 2012 wurden in der Zusatzanalyse die Testhefte 2, 8 und 12 für Items an der ersten Position verwendet, was in  $N = 1\,145$  Schülerinnen und Schüler resultierte. Für die dritte Position kamen die Testhefte 3, 10 und 13 zum Einsatz, für die insgesamt  $N = 1\,102$  Schülerinnen und Schüler vorlagen.

Für PISA 2009 wurden die Testhefte 3, 10 und 13 für die erste Position ( $N = 1\,111$ ) sowie für die dritte Position die Testhefte 4, 7 und 8 ( $N = 1\,092$ ) verwendet.

In der Zusatzanalyse wurden für PISA 2006 die Testhefte 1, 2, 3, 5, 6 und 7 für die erste Position ( $N = 2\,166$ ) sowie für die dritte Position die Testhefte 4, 8, 9, 10 und 12 ( $N = 1\,827$ ) eingesetzt.

---

<sup>1</sup>Die Anlage der Zusatzanalyse erfolgte in Erarbeitung mit Matthias Trendtel (Bundesinstitut für Bildungsforschung, Innovation und Entwicklung des österreichischen Schulwesens, BIFIE, Salzburg).

Um die Erfassung der Kompetenz nicht mit möglichen Positionseffekten zu konfundieren, wurden die ausgewählten Schülerinnen und Schüler aller PISA-Erhebungen der Zusatzanalyse re-gewichtet, so dass Schüler/innen an beiden Positionen in gleichen Anteilen vorlagen.

Da die Analysen im Artikel zeigen, dass die Wahl des Skalierungsmodells (1PL vs. 2PL bzw. konkurrente Skalierung vs. separate Skalierung mit anschließendem Linking) keinen entschei-denden Einfluss besaß, beschränken wir uns in der Darstellung nur auf die separate Skalierung nach dem 1PL mit dem anschließenden Linking nach der Methode von Haberman. Es wurden von den eingesetzten alten Items alle Items berücksichtigt (d. h. die laut OECD invarianten Items nicht ausgeschlossen).

Tabelle C1 zeigt die marginale Trendschätzung für die ausgewählten Schülerinnen und Schüler der Zusatzanalyse (Methode H1Z) im Vergleich zur international berichteten Trendschätzung (Methode Original) und der marginalen Trendschätzung auf Basis aller Schülerinnen und Schüler (Methode H; siehe Artikel).

*Tabelle C1.* Trendschätzungen in Naturwissenschaften auf Basis alter Items

| Methode  | 2006 | 2009 | 2012 | 2015 |
|----------|------|------|------|------|
| Original | 516  | 520  | 524  | 509  |
| H1       | 516  | 515  | 522  | 506  |
| H1Z      | 516  | 515  | 520  | 508  |

*Anmerkungen.* Original = originale Trendschätzung (aus Tabelle 4 des Artikels entnommen), H1 = Linking nach der Methode von Haberman unter 1PL-Modell mit allen Items (aus Tabelle 4 des Artikels entnommen), H1Z = Linking nach der Methode Haberman unter 1PL-Modell mit ausschließlich alten Items und dem beschriebenen Design der Zusatzanalyse (siehe Beschreibung).

Die marginalen Trendschätzungen auf Basis der alten Items unter Elimination möglicher Kon-texteffekte (Methode H1Z) unterscheiden sich nur geringfügig von den marginalen Trendschätzun-gen auf Basis der alten und neuen Items (Methode H1). In einer zweidimensionalen Skalierung der Leistungsdaten in Naturwissenschaften in PISA 2015, in der die alten und die neuen Items jeweils eine Dimension darstellten, ergab sich ein Korrelation von praktisch Eins, d. h. psy-chometrisch ließ sich durch den Einsatz der neuen Aufgabenformate nicht zeigen, dass sich die Dimensionalität des Konstrukts geändert hätte.
